# Supplementary material for: Indices of Pacific Walker Circulation Strength
Source: MDPI journal article supplement (doi:10.3390/atmos14020397), 2023-02-17
Supplement: s1 [file s1]

Archive with 1 entries (1 files):
- atmosphere-2201193-supplementary.pdf
